# Supplementary material for: Negative thermal expansion in Sc2Mo3O12:Sm3+ for white LEDs and unveiling the impact of phase transition on cryogenic luminescence
Source: Royal Society of Chemistry journal article supplement (doi:10.1039/d4tc01817f), 2024-01-01
Supplement: d4tc01817f1.pdf [file d4tc01817f1.pdf]

## Supplementary Information

### Negative Thermal Expansion in $\text{Sc}_2\text{Mo}_3\text{O}_{12}:\text{Sm}^{3+}$ for White LEDs and Unveiling the Impact of Phase Transition on Cryogenic Luminescence

Annu Balhara,<sup>1,2</sup> Santosh K. Gupta,<sup>1,2\*</sup> Malini Abraham,<sup>3,4</sup> Ashok Kumar Yadav,<sup>5</sup> Mohsin Jafar,<sup>6</sup> Subrata Das,<sup>3,4</sup>

<sup>1</sup>Radiochemistry Division, Bhabha Atomic Research Centre, Trombay, Mumbai-400085, India

<sup>2</sup>Homi Bhabha National Institute, Mumbai-400094

<sup>3</sup>Materials Science and Technology Division, CSIR-National Institute for Interdisciplinary Science and Technology, Thiruvananthapuram, Kerala-695019

<sup>4</sup>Academy of Scientific and Innovative Research (AcSIR), Ghaziabad-201002, India

<sup>5</sup>Atomic & Molecular Physics Division, Bhabha Atomic Research Centre, Mumbai – 400085

<sup>6</sup>Chemistry Division, Bhabha Atomic Research Centre, Trombay, Mumbai-400085, India

*\*To whom correspondence should be addressed. Electronic mail: [\\*santoshg@barc.gov.in/santufrnd@gmail.com](mailto:*santoshg@barc.gov.in/santufrnd@gmail.com) (SKG)*

#### S1. Characterization

The powder XRD patterns were acquired on a Proto-AXRD bench top system in the  $2\theta$  range of  $10-70^\circ$  using the Cu  $K\alpha$  line ( $\lambda = 1.5406 \text{ \AA}$ ) and a scanning rate of  $1^\circ/\text{min}$ . Fourier Transform Infrared Spectroscopy (FTIR) was performed in ATR mode on a Bruker Alpha FTIR spectrometer in the scanning range from  $500$  to  $4000 \text{ cm}^{-1}$  using average of 36 scans with a resolution of  $4 \text{ cm}^{-1}$ . The scanning electron microscopy (SEM) was performed on a SEM (Model: JEOL ICM6000Plus-7E, Japan) system at 15 kV. Rietveld refinement was done on powder XRD patterns by using FullProf software.<sup>1</sup> HT-XRD measurements were done on GNR Explore X-ray Diffractometer with a heating rate of  $10 \text{ K/min}$  and equilibrium time of 10 minutes. An X-ray Absorption Spectroscopy (XAS) measurement, which comprises of both X-ray Near Edge Structure (XANES) and Extended X-ray Absorption Fine Structure (EXAFS)

techniques, have been carried out on undoped and Sm doped  $\text{Sc}_2\text{Mo}_3\text{O}_{12}$  at Mo K-edge in transmission mode and Sm  $L_3$ -edge in fluorescence mode to probe the local structure. The XAS measurements have been carried out at the Energy-Scanning EXAFS beamline (BL-9) at the Indus-2 Synchrotron Source (2.5 GeV, 100 mA) at Raja Ramanna Centre for Advanced Technology (RRCAT), Indore, India.<sup>2, 3</sup> PL and PLE spectra were recorded with a continuous Xenon lamp (450 W) source on a FLS 1000 fluorescence spectrometer (Edinburgh Instruments, U.K.), and visible-PMT as the detector. Emission photographs were captured under the excitation wavelength of 270 nm by Nikon camera. Low temperature-dependent PL studies were performed using cryostat assembly with FLS-1000 fluorescence spectrometer and liquid nitrogen as coolant. Temperature-dependent PL spectra at high temperature were measured using an Ocean optics spectrophotometer that has a Maya 2000 PRO with a 280 nm LEDs as excitation source. Differential scanning calorimeter (DSC) measurements were performed on M/s. Mettler Toledo GmbH, Switzerland. A prototype white-LED was fabricated by pasting a mixture of phosphors onto a 280 nm UV LED chip operating at a voltage of 12 V and current of 2 A. The red pc-LEDs were fabricated by combining this optimized red phosphor with a 280 nm UV-LED chip and a 410 nm blue LED chip individually, both operated at a voltage of 12 V and current of 2 A. The temperature-dependent Raman spectroscopy was performed using the Linkam thermal stage (HFS600E) having temperature control accuracy of 1 °C and a heating rate of 10 °C min<sup>-1</sup>. A sufficient time hold of 5 min is taken at each temperature step for sample temperature stabilization.

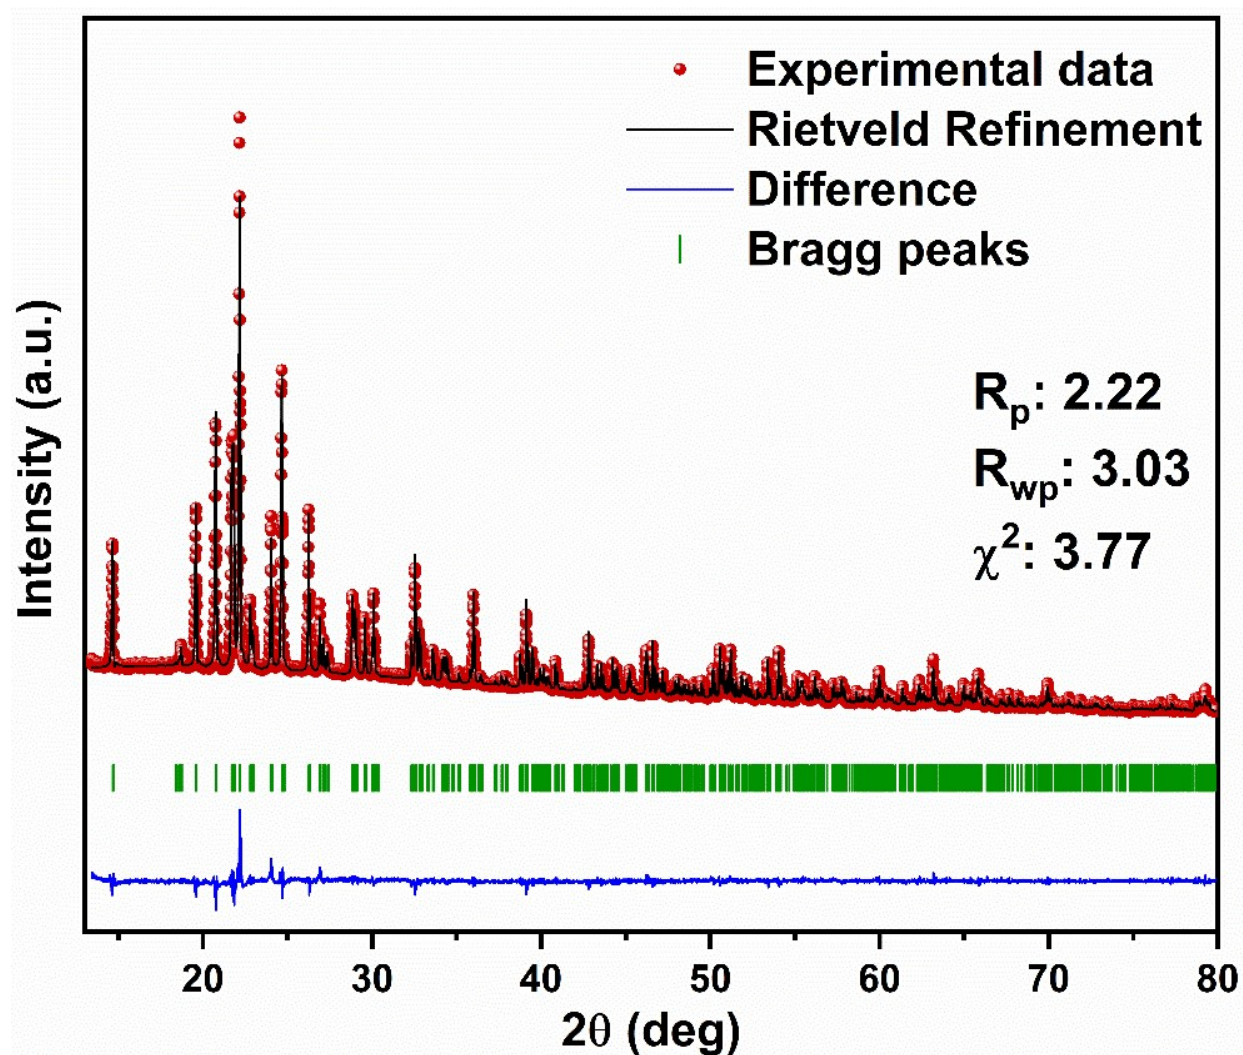

Figure S1: Rietveld fitting of powder XRD patterns of undoped  $\text{Sc}_2\text{Mo}_3\text{O}_{12}$  sample at room temperature.

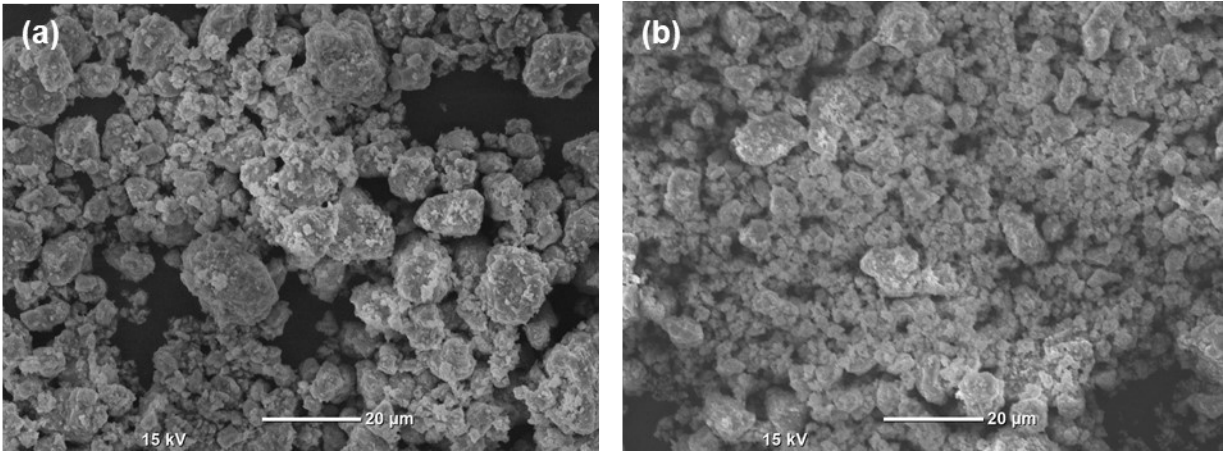

**Figure S2: SEM images of (a) SMO:5Sm and (b) SMO:10 Sm phosphors.**

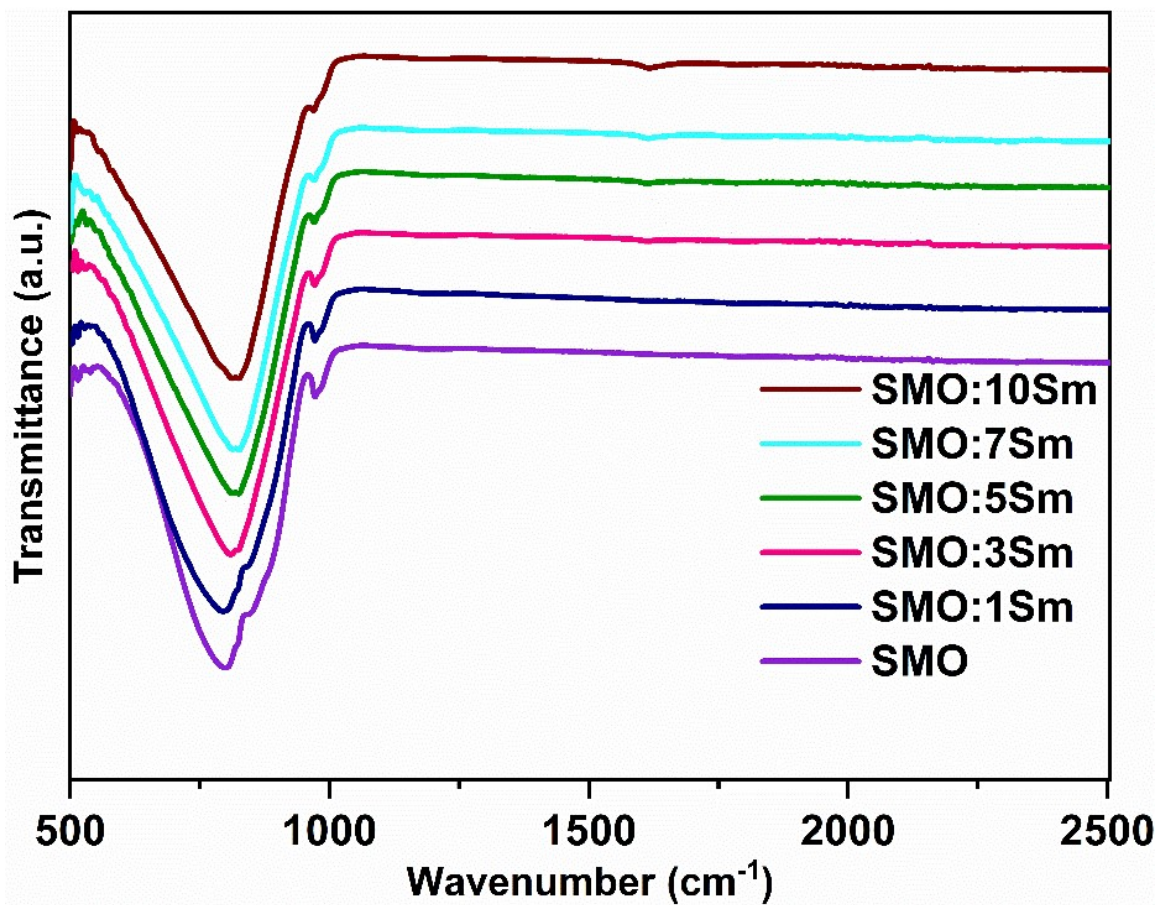

Figure S3: FTIR spectra of Sc<sub>2</sub>Mo<sub>3</sub>O<sub>12</sub>:xSm<sup>3+</sup> ( $x = 0, 1, 3, 5, 7$  and 10 mol %) phosphors.

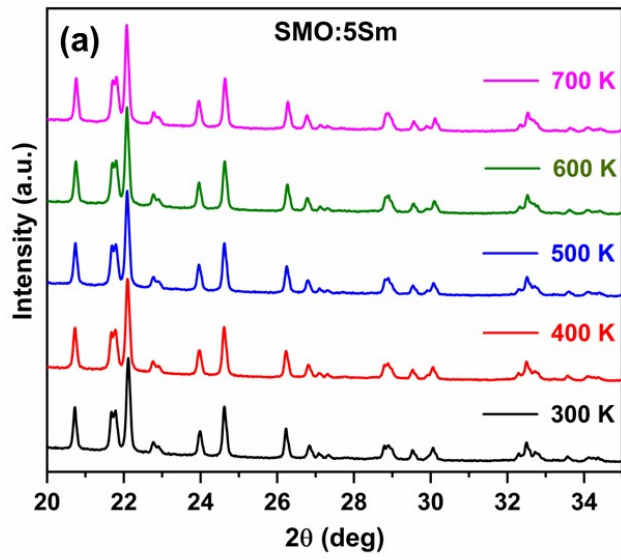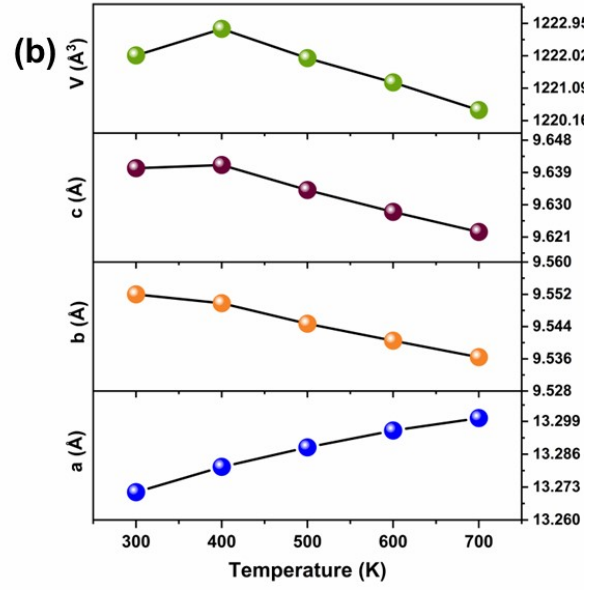

**Figure S4: (a) High temperature-dependent XRD patterns of SMO:5Sm sample and (b) Changes in unit cell parameters with temperature in the range of 300 to 700 K.**



**Table S1: Lattice parameters for SMO at different temperature from 300 to 700 K**

| Temperature (K) | a (Å)       | B (Å)     | c (Å)      | V (Å <sup>3</sup> ) |
|-----------------|-------------|-----------|------------|---------------------|
| 300             | 13.2403(3)  | 9.5426(3) | 9.6356(3)  | 1217.425(045)       |
| 400             | 13.2516(9)  | 9.5345(9) | 9.6282(9)  | 1216.511(180)       |
| 500             | 13.2615(9)  | 9.5292(9) | 9.6201(9)  | 1215.720(180)       |
| 600             | 13.2698(15) | 9.5244(9) | 9.6129(12) | 1214.941(240)       |
| 700             | 13.2770(15) | 9.5216(9) | 9.6071(12) | 1214.510(240)       |

**Table S2: Lattice parameters for SMO:5Sm at different temperature from 300 to 700 K.**

| Temperature (K) | a (Å)       | B (Å)     | c (Å)     | V (Å <sup>3</sup> ) |
|-----------------|-------------|-----------|-----------|---------------------|
| 300             | 13.2710(3)  | 9.5520(3) | 9.6402(3) | 1222.030(072)       |
| 400             | 13.2810(12) | 9.5498(9) | 9.6411(9) | 1222.793(210)       |
| 500             | 13.2887(12) | 9.5447(9) | 9.6341(9) | 1221.953(210)       |
| 600             | 13.2954(6)  | 9.5405(6) | 9.6280(6) | 1221.256(105)       |
| 700             | 13.3003(12) | 9.5364(9) | 9.6224(9) | 1220.461(180)       |

**Table S3: Lifetime values of SMO:Sm samples at 647 nm emission and  $\lambda_{\text{ex}} = 270$  nm and 404 nm, respectively.**

| <b><math>\lambda_{\text{ex}} = 270</math> nm and <math>\lambda_{\text{em}} = 647</math> nm</b> |                            |       |                            |       |                                      |
|------------------------------------------------------------------------------------------------|----------------------------|-------|----------------------------|-------|--------------------------------------|
| Sample                                                                                         | $\tau_1$ ( $\mu\text{s}$ ) | %     | $\tau_2$ ( $\mu\text{s}$ ) | %     | $\tau_{\text{av}}$ ( $\mu\text{s}$ ) |
| 1Sm                                                                                            | 452 $\pm$ 10.1             | 17.49 | 1143.5 $\pm$ 4.60          | 82.51 | 1022.56 $\pm$ 4.19                   |
| 3Sm                                                                                            | 364 $\pm$ 3.61             | 35.8  | 1020 $\pm$ 4.27            | 64.2  | 785.15 $\pm$ 3.03                    |
| 5Sm                                                                                            | 298.5 $\pm$ 2.81           | 41.6  | 952.8 $\pm$ 4.82           | 58.4  | 680.61 $\pm$ 3.04                    |
| 7Sm                                                                                            | 274 $\pm$ 2.45             | 43.63 | 896.05 $\pm$ 4.81          | 56.37 | 624.65 $\pm$ 2.91                    |
| 10Sm                                                                                           | 271 $\pm$ 2.21             | 47.71 | 892.92 $\pm$ 4.89          | 52.29 | 596.20 $\pm$ 2.77                    |
| <b><math>\lambda_{\text{ex}} = 404</math> nm and <math>\lambda_{\text{em}} = 647</math> nm</b> |                            |       |                            |       |                                      |
| Sample                                                                                         | $\tau_1$ ( $\mu\text{s}$ ) | %     | $\tau_2$ ( $\mu\text{s}$ ) | %     | $\tau_{\text{av}}$ ( $\mu\text{s}$ ) |
| 1Sm                                                                                            | 387 $\pm$ 8.16             | 16.99 | 1110 $\pm$ 3.94            | 83.01 | 987.16 $\pm$ 3.55                    |
| 3Sm                                                                                            | 303.8 $\pm$ 3.84           | 32.14 | 905.94 $\pm$ 4.26          | 67.86 | 712.41 $\pm$ 3.14                    |
| 5Sm                                                                                            | 253.1 $\pm$ 3.24           | 39.65 | 793.33 $\pm$ 5.10          | 60.35 | 579.13 $\pm$ 3.33                    |
| 7Sm                                                                                            | 255.86 $\pm$ 2.99          | 43.7  | 773.5 $\pm$ 5.28           | 56.31 | 547.37 $\pm$ 3.25                    |
| 10Sm                                                                                           | 220.34 $\pm$ 2.29          | 43.72 | 714.41 $\pm$ 4.29          | 56.28 | 498.40 $\pm$ 2.62                    |



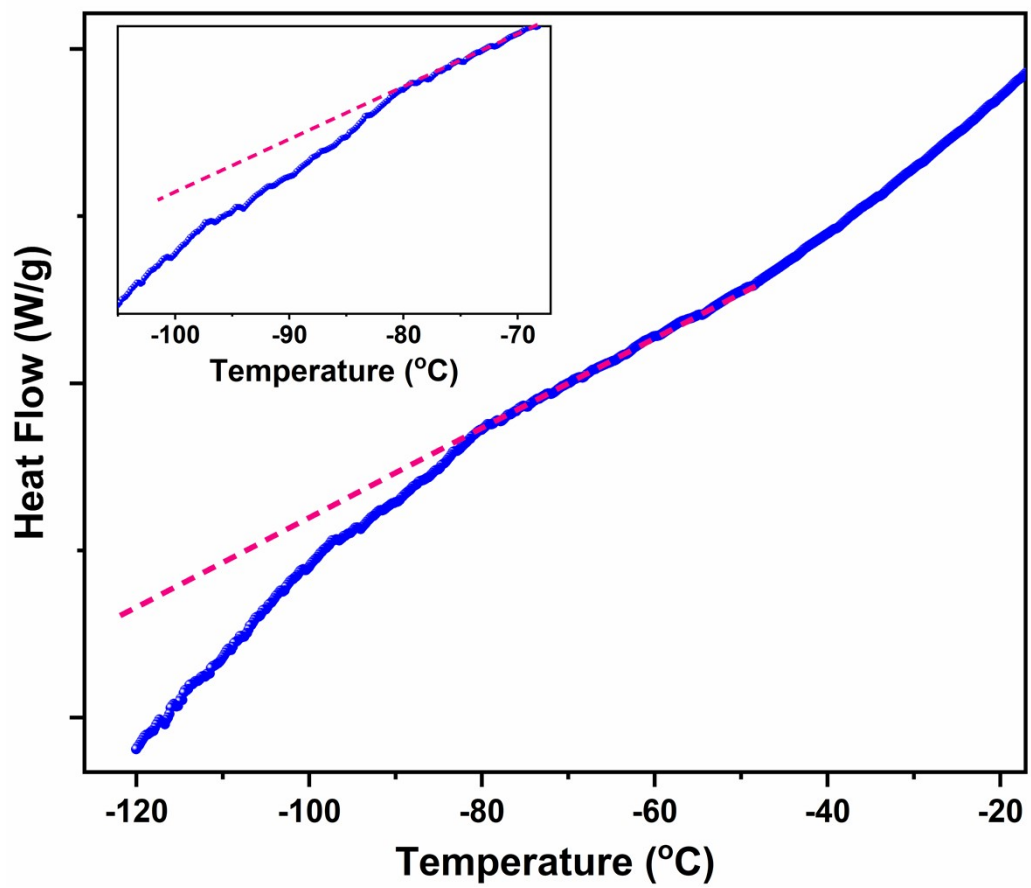

Figure S5: DSC Curve showing the phase transition.

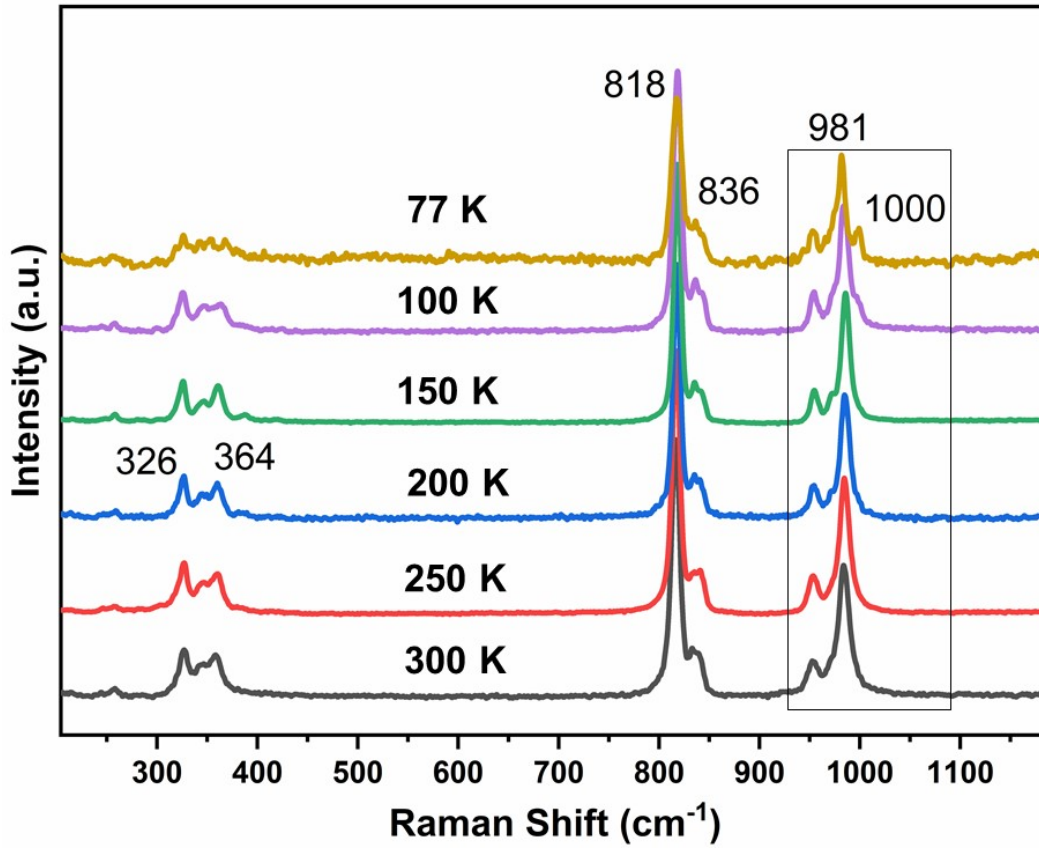

Figure S6: Raman spectra of Sc<sub>2</sub>Mo<sub>3</sub>O<sub>12</sub>:5Sm at different temperatures.

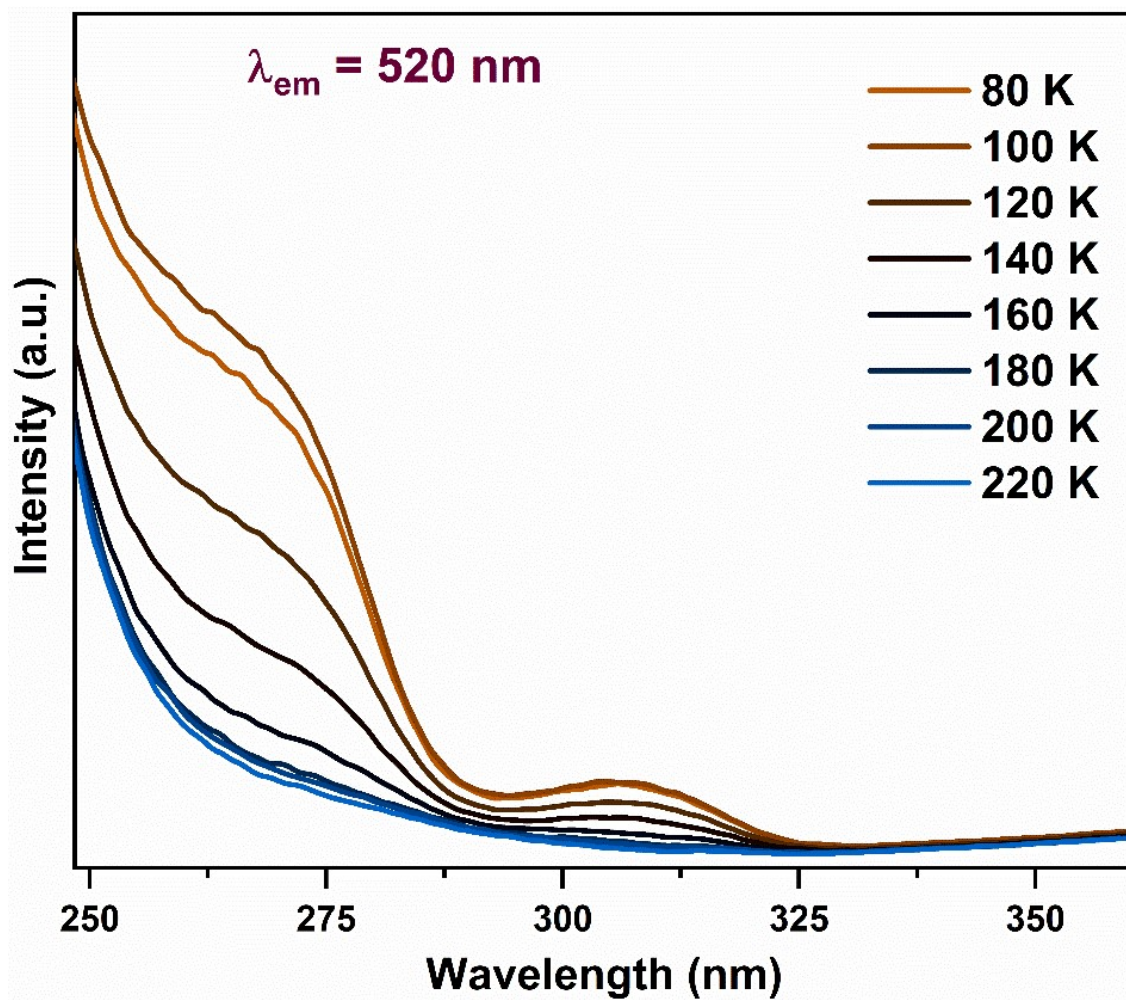

Figure S7: Temperature-dependent PL excitation spectra of SMO:5Sm sample monitored at 520 nm emission in the range of 80 to 300 K.

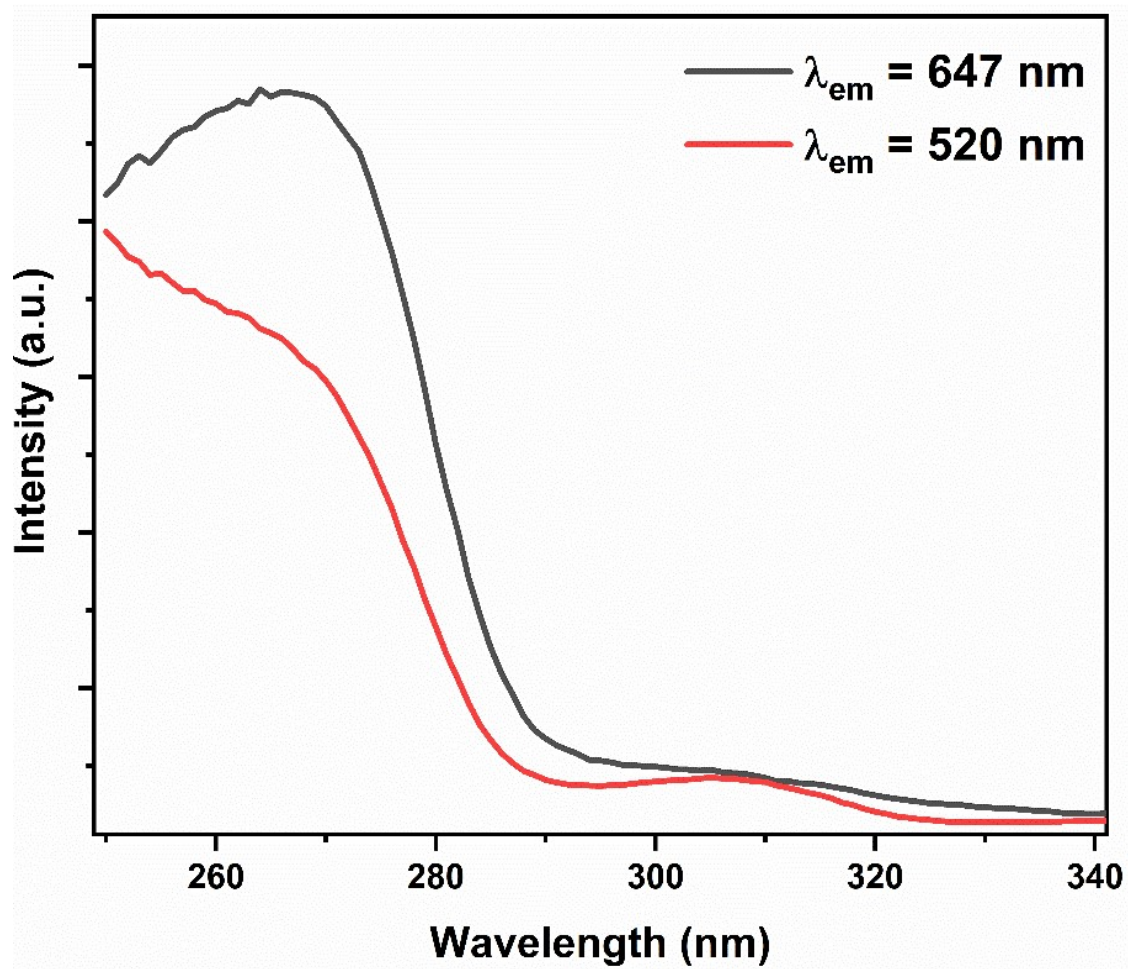

Figure S8: Excitation spectrum acquired at host emission (520 nm) and  $\text{Sm}^{3+}$  emission (647 nm).

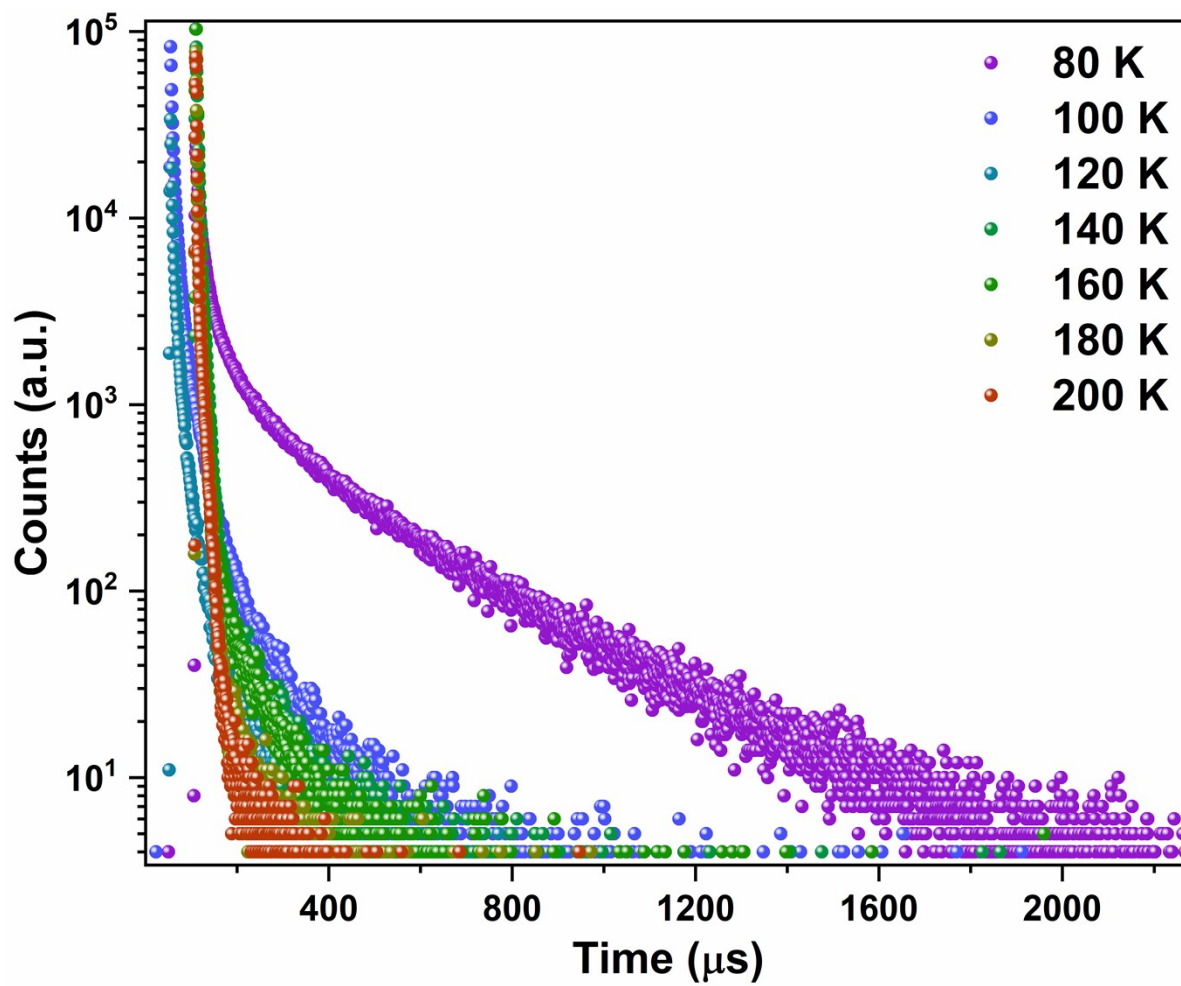

Figure S9: Temperature-dependent decay profiles of SMO:5Sm sample for 520 nm emission excited at 270 nm.

**Table S4: Temperature-dependent Lifetime values of SMO:Sm samples at 647 nm emission and  $\lambda_{\text{ex}} = 270$  nm from 80 to 300 K.**

| <b>T (K)</b> | $\tau_1$ ( $\mu\text{s}$ ) | %    | $\tau_2$ ( $\mu\text{s}$ ) | %    | $\tau_{\text{av}}$ ( $\mu\text{s}$ ) |
|--------------|----------------------------|------|----------------------------|------|--------------------------------------|
| <b>80</b>    | 237.43 $\pm$ 4.80          | 24.7 | 1382.14 $\pm$ 10.87        | 75.3 | 1099.40 $\pm$ 8.27                   |
| <b>100</b>   | 244.7 $\pm$ 11.61          | 18.4 | 1380.9 $\pm$ 15.95         | 81.6 | 1171.84 $\pm$ 13.19                  |
| <b>120</b>   | 305.9 $\pm$ 8.22           | 20.7 | 1410.3 $\pm$ 12.29         | 79.3 | 1181.69 $\pm$ 9.89                   |
| <b>140</b>   | 272.63 $\pm$ 8.75          | 22.3 | 1380.6 $\pm$ 14.40         | 77.7 | 1133.52 $\pm$ 11.36                  |
| <b>160</b>   | 232.36 $\pm$ 7.00          | 23.2 | 1288.2 $\pm$ 12.89         | 76.8 | 1043.24 $\pm$ 10.03                  |
| <b>180</b>   | 245.71 $\pm$ 6.30          | 27.2 | 1296.89 $\pm$ 13.27        | 72.8 | 1010.97 $\pm$ 9.81                   |
| <b>200</b>   | 228.46 $\pm$ 6.14          | 25.4 | 1224.36 $\pm$ 11.75        | 74.6 | 971.20 $\pm$ 8.90                    |
| <b>220</b>   | 223.4 $\pm$ 5.43           | 28.6 | 1218.65 $\pm$ 12.17        | 71.4 | 934.01 $\pm$ 8.83                    |
| <b>240</b>   | 243.75 $\pm$ 6.06          | 30.1 | 1209.46 $\pm$ 13.15        | 69.9 | 918.78 $\pm$ 9.37                    |
| <b>260</b>   | 250.37 $\pm$ 5.30          | 33.3 | 1249.46 $\pm$ 13.19        | 66.8 | 917.26 $\pm$ 8.98                    |
| <b>280</b>   | 216.2 $\pm$ 4.16           | 32.1 | 1113.67 $\pm$ 9.60         | 67.9 | 825.58 $\pm$ 6.66                    |
| <b>300</b>   | 177.02 $\pm$ 3.98          | 34.6 | 687.13 $\pm$ 7.37          | 65.4 | 510.63 $\pm$ 5.01                    |

**Table S5: Temperature-dependent Lifetime values of SMO:Sm samples at 647 nm emission and  $\lambda_{\text{ex}} = 404$  nm from 80 to 300 K.**

| <b>T (K)</b> | $\tau_1$ ( $\mu\text{s}$ ) | %    | $\tau_2$ ( $\mu\text{s}$ ) | %    | $\tau_{\text{av}}$ ( $\mu\text{s}$ ) |
|--------------|----------------------------|------|----------------------------|------|--------------------------------------|
| <b>80</b>    | 222 $\pm$ 16.53            | 19.2 | 1183.6 $\pm$ 29.13         | 80.8 | 998.97 $\pm$ 23.75                   |
| <b>100</b>   | 207 $\pm$ 15.76            | 18.5 | 1118.5 $\pm$ 25.94         | 81.5 | 949.87 $\pm$ 21.34                   |
| <b>120</b>   | 266.03 $\pm$ 17.82         | 24.4 | 1135.12 $\pm$<br>28.54     | 75.6 | 923.06 $\pm$ 22.01                   |
| <b>140</b>   | 169.42 $\pm$ 11.36         | 19.0 | 1030.1 $\pm$ 20.78         | 81.0 | 866.66 $\pm$ 16.97                   |
| <b>160</b>   | 239.5 $\pm$ 8.62           | 27.6 | 1199.4 $\pm$ 20.52         | 72.4 | 934.47 $\pm$ 15.05                   |
| <b>180</b>   | 188.67 $\pm$ 14.27         | 19.8 | 998.99 $\pm$ 25.49         | 80.2 | 838.55 $\pm$ 20.64                   |
| <b>200</b>   | 163.65 $\pm$ 9.80          | 20.7 | 954.3 $\pm$ 18.46          | 79.3 | 790.63 $\pm$ 14.78                   |

|            |                |      |                |      |                |
|------------|----------------|------|----------------|------|----------------|
| <b>220</b> | 184.95 ± 10.69 | 23.2 | 975.28 ± 21.24 | 76.8 | 791.92 ± 16.50 |
| <b>240</b> | 204.6 ± 11.27  | 27.5 | 1007 ± 26.17   | 72.5 | 786.34 ± 19.22 |
| <b>260</b> | 204.1 ± 10.56  | 28.4 | 1014.3 ± 26.97 | 71.6 | 784.20 ± 19.54 |
| <b>280</b> | 206.15 ± 11.01 | 32.4 | 883.8 ± 30.63  | 67.6 | 664.24 ± 21.01 |
| <b>300</b> | 170.4 ± 10.52  | 30.7 | 661.5 ± 21.42  | 69.3 | 510.73 ± 15.19 |

## References

1. Rodríguez-Carvajal, J., Recent advances in magnetic structure determination by neutron powder diffraction. *Physica B: Condensed Matter* 1993, 192, (1), 55-69.
2. Basu, S.; Nayak, C.; Yadav, A.; Agrawal, A.; Poswal, A.; Bhattacharyya, D.; Jha, S.; Sahoo, N. In *A comprehensive facility for EXAFS measurements at the INDUS-2 synchrotron source at RRCAT, Indore, India*, Journal of Physics: Conference Series, 2014; IOP Publishing: 2014; p 012032.
3. Poswal, A.; Agrawal, A.; Yadav, A.; Nayak, C.; Basu, S.; Kane, S.; Garg, C.; Bhattacharyya, D.; Jha, S.; Sahoo, N. In *Commissioning and first results of scanning type EXAFS beamline (BL-09) at INDUS-2 synchrotron source*, AIP Conference Proceedings, 2014; American Institute of Physics: 2014; pp 649-651.
